# Supplementary material
Source: PubMed Central journal article supplement (PMC7572589)
Supplement: NIHMS1593661-supplement-1.pdf [file NIHMS1593661-supplement-1.pdf]

411 Appendix

412 In addition to the authors, other members of the *Eunice Kennedy Shriver* National Institute of Child Health  
413 and Human Development Maternal-Fetal Medicine Units Network are as follows:

414 *University of North Carolina at Chapel Hill, Chapel Hill, NC* – K. Clark, J. Thorp, K. Boggess, S. Timlin, K.  
415 Eichelberger (Greenville Memorial Hospital), A. Moore (Greenville Memorial Hospital), C. Beamon  
416 (WakeMed Health & Hospitals), H. Byers (WakeMed Health & Hospitals)

417 *Northwestern University, Chicago, IL* – G. Mallett, A. Peaceman, B. Plunkett (NorthShore University), K.  
418 Paycheck (NorthShore University), M. Dinsmoor (NorthShore University)

419 *University of Alabama at Birmingham, Birmingham, AL* – S. Harris, J. Sheppard, J. Biggio, L. Harper,  
420 S. Longo (Ochsner), C. Servay (Ochsner)

421 *University of Utah Health Sciences Center, Salt Lake City, UT* – K. Hill, M. Varner, A. Sowles, K. Coleman  
422 (Utah Valley Hospital), D. Atkinson (Utah Valley Hospital), J. Stratford (McKay-Dee Hospital), S.  
423 Dellermann (McKay-Dee Hospital), C. Meadows (McKay-Dee Hospital), S. Esplin (Intermountain Med  
424 Ctr), C. Martin (Intermountain Med Ctr), K. Peterson (Intermountain Med Ctr), S. Stradling (LDS  
425 Hospital)

426 *Stanford University, Stanford, CA* – C. Willson, D. Lyell, A. Girsen, R. Knapp

427 *Columbia University, New York, NY* – C. Gyamfi, S. Bousleiman, A. Perez-Delboy, M. Talucci, V.  
428 Carmona, L. Plante (Drexel University), C. Tocci (Drexel University), B. Leopanto (Drexel University),  
429 M. Hoffman (Christiana Care), L. Dill-Grant (Christiana Care), K. Palomares (St. Peter's Univ. Hosp.),  
430 S. Otarola (St. Peter's Univ. Hosp.), D. Skupski (NYP Queen), R. Chan (NYP Queens)

431 *Brown University, Providence, RI* – D. Allard, T. Gelsomino, J. Rousseau, L. Beati, J. Milano, E. Werner

432 *University of Texas Medical Branch, Galveston, TX* – A. Salazar, M. Costantine, G. Chiossi, L. Pacheco,  
433 A. Saad, M. Munn, S. Jain, S. Clark

434 *UT Health- University of Texas Medical School at Houston--Children's Memorial Hermann Hospital,*  
435 *Houston, TX* – F. Ortiz, L. Garcia (Harris Health System, Lyndon B. Johnson Hospital), B. Sibai

436 *The Ohio State University, Columbus, OH* – A. Bartholomew, C. Buhimschi, M. Landon, F. Johnson, L.  
437 Webb, D. McKenna (Miami Valley Hospital), K. Fennig (Miami Valley Hospital), K. Snow (Miami Valley  
438 Hospital), M. Habli (Good Samaritan Hospital), M. McClellan (Good Samaritan Hospital), C. Lindeman  
439 (Good Samaritan Hospital)

440 *MetroHealth Medical Center-Case Western Reserve University, Cleveland, OH* – W. Dalton, D. Hackney  
441 (University Hospital Cleveland), H. Cozart, A. Mayle, B. Mercer

442 *University of Texas Southwestern Medical Center, Dallas, TX* – L. Moseley, J. Gerald, L. Fay-Randall, M.  
443 Garcia, A. Sias, J. Price

444 *University of Colorado, Denver, CO* – K. Hale, J. Phipers, K. Heyborne

445 *University of Pennsylvania, Philadelphia, PA* – J. Craig, S. Parry, H. Sehdev (Pennsylvania Hospital)

446 *Duke University, Durham, NC* – T. Bishop, J. Ferrara

447 *University of Pittsburgh, Pittsburgh, PA* – M. Bickus, S. Caritis

448 *The George Washington University Biostatistics Center, Washington, DC* – E. Thom, M. Rice, L. Doherty,  
449 J. de Voest

450 *Eunice Kennedy Shriver National Institute of Child Health and Human Development, Bethesda, MD* – S.  
451 Tolivaisa, M. Miodovnik

452 *MFMU Network Steering Committee Chair (Washington University, Saint Louis, MO)* – G. A. Macones,  
453 MD, MSCE

454
